# Supplementary material for: Recurrent E. coli Urinary Tract Infections in Nursing Homes: Insight in Sequence Types and Antibiotic Resistance Patterns
Source: MDPI journal article supplement (doi:10.3390/antibiotics11111638), 2022-11-16
Supplement: s1 [file s1]

## Supplementary material

**Table S2: Antibiotic resistance rates based on *E. coli* isolates from PROGRESS study**

|                                    | <i>E. coli</i> episode<br>from single UTI episode |              | <i>E. coli</i> episode<br>from recurrent UTI group<br>(recurrence) |             | All <i>E. coli</i> episode from both<br>single and recurrent episode<br>(overall) |              |
|------------------------------------|---------------------------------------------------|--------------|--------------------------------------------------------------------|-------------|-----------------------------------------------------------------------------------|--------------|
|                                    | N                                                 | Resistance % | N                                                                  | Resistance  | N                                                                                 | Resistance % |
| <b>Amoxicillin</b>                 | 80                                                | <b>37.5</b>  | 67                                                                 | <b>43.3</b> | 148                                                                               | <b>39.9</b>  |
| <b>Amoxicillin-clavulanic acid</b> | 83                                                | <b>36.1</b>  | 65                                                                 | <b>40.0</b> | 148                                                                               | <b>37.8</b>  |
| <b>Cefotaxime</b>                  | 81                                                | <b>4.9</b>   | 66                                                                 | <b>4.5</b>  | 147                                                                               | <b>4.8</b>   |
| <b>Cefoxitin</b>                   | 79                                                | <b>21.5</b>  | 64                                                                 | <b>17.2</b> | 143                                                                               | <b>19.6</b>  |
| <b>Ceftazidime</b>                 | 81                                                | <b>2.5</b>   | 67                                                                 | <b>4.5</b>  | 148                                                                               | <b>3.4</b>   |
| <b>Ceftriaxone</b>                 | 81                                                | <b>4.9</b>   | 67                                                                 | <b>4.5</b>  | 148                                                                               | <b>4.7</b>   |
| <b>Ciprofloxacin</b>               | 81                                                | <b>9.9</b>   | 67                                                                 | <b>10.4</b> | 148                                                                               | <b>10.1</b>  |
| <b>Cotrimoxazol</b>                | 81                                                | <b>13.6</b>  | 67                                                                 | <b>9.0</b>  | 148                                                                               | <b>11.5</b>  |
| <b>Fosfomycin</b>                  | 81                                                | <b>1.2</b>   | 67                                                                 | <b>1.5</b>  | 148                                                                               | <b>1.4</b>   |
| <b>Gentamicin</b>                  | 81                                                | <b>3.7</b>   | 67                                                                 | <b>0.0</b>  | 148                                                                               | <b>2.0</b>   |
| <b>Imipenem</b>                    | 81                                                | <b>0.0</b>   | 67                                                                 | <b>0.0</b>  | 148                                                                               | <b>0.0</b>   |
| <b>Meropenem</b>                   | 81                                                | <b>0.0</b>   | 67                                                                 | <b>0.0</b>  | 148                                                                               | <b>0.0</b>   |
| <b>Nitrofurantonin</b>             | 81                                                | <b>6.2</b>   | 67                                                                 | <b>1.5</b>  | 148                                                                               | <b>4.1</b>   |
| <b>Trimethoprim</b>                | 81                                                | <b>19.8</b>  | 67                                                                 | <b>9.0</b>  | 148                                                                               | <b>14.9</b>  |
| <b>Tobramycin</b>                  | 79                                                | <b>2.5</b>   | 64                                                                 | <b>0.0</b>  | 143                                                                               | <b>1.4</b>   |
